# Supplementary material for: The construction of Ru-doped In2O3 hollow peanut-like structure for an enhanced photocatalytic nitrogen reduction under solar light irradiation
Source: Royal Society of Chemistry journal article supplement (doi:10.1039/d1se00257k), 2021-01-01
Supplement: d1se00257k1.pdf [file d1se00257k1.pdf]

## **Supporting information**

### **Construction of Ru doped In<sub>2</sub>O<sub>3</sub> hollow peanut-like structure for enhanced photocatalytic nitrogen reduction under solar light irradiation**

Manh-Hiep Vu, Toan-Anh Quach, Trong-On Do\*

*Department of Chemical Engineering, Laval University, Québec (Québec), G1V 0A6, Canada*

\*E-mail: [trong-on.do@gch.ulaval.ca](mailto:trong-on.do@gch.ulaval.ca)

**Number of pages: 9**

**Number of figures: 7**

## Determination of ammonia

The ammonia concentration was spectrophotometrically measured by the indophenol blue method. Briefly, 1 mL of reacted solution was removed from the photoreactor. Next, 2 mL of 1M NaOH containing 5 wt% salicylic acid and 5 wt% sodium citrate, 1 mL of 0.05 M NaClO and 0.2 mL of 1 wt%  $C_5FeN_6Na_2O$  (sodium nitroferricyanide) were sequentially added to the solution. After 2h at ambient temperature, 2 mL of as-prepared solution was drawn out for UV-Vis measurement at a wavelength of 655 nm to determine the formation of indophenol blue (**Figure S1**). For the calibration of the concentration-absorbance curve, standard ammonia chloride solution with the concentration of 10, 20, 30, 40, 50, 100  $\mu$ M in 10 vol% MeOH were used (Figure S.1), which contained the same concentration of MeOH as in the testing solution.

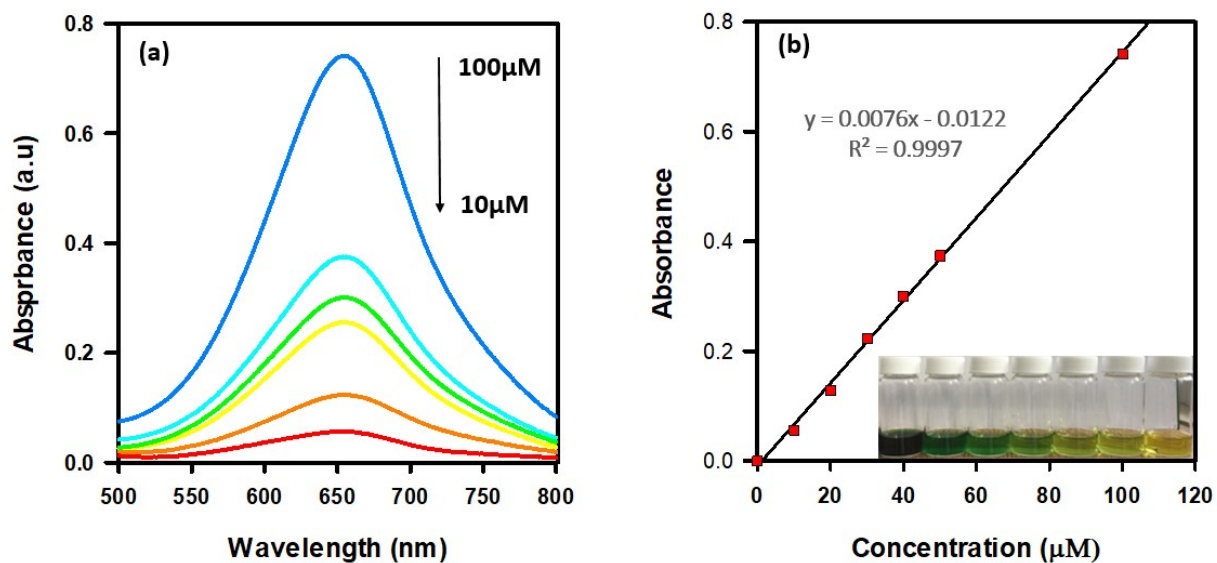

**Figure S1:** (a) UV-vis spectra for ammonium quantification using the indophenol-blue method with the concentration of 10, 20, 30, 40, 50, 100  $\mu\text{M}$  in 10 vol% MeOH, respectively; (b) The calibration curve for ammonium quantification ( $\text{NH}_4^+$  concentration versus absorbance at 655 nm).

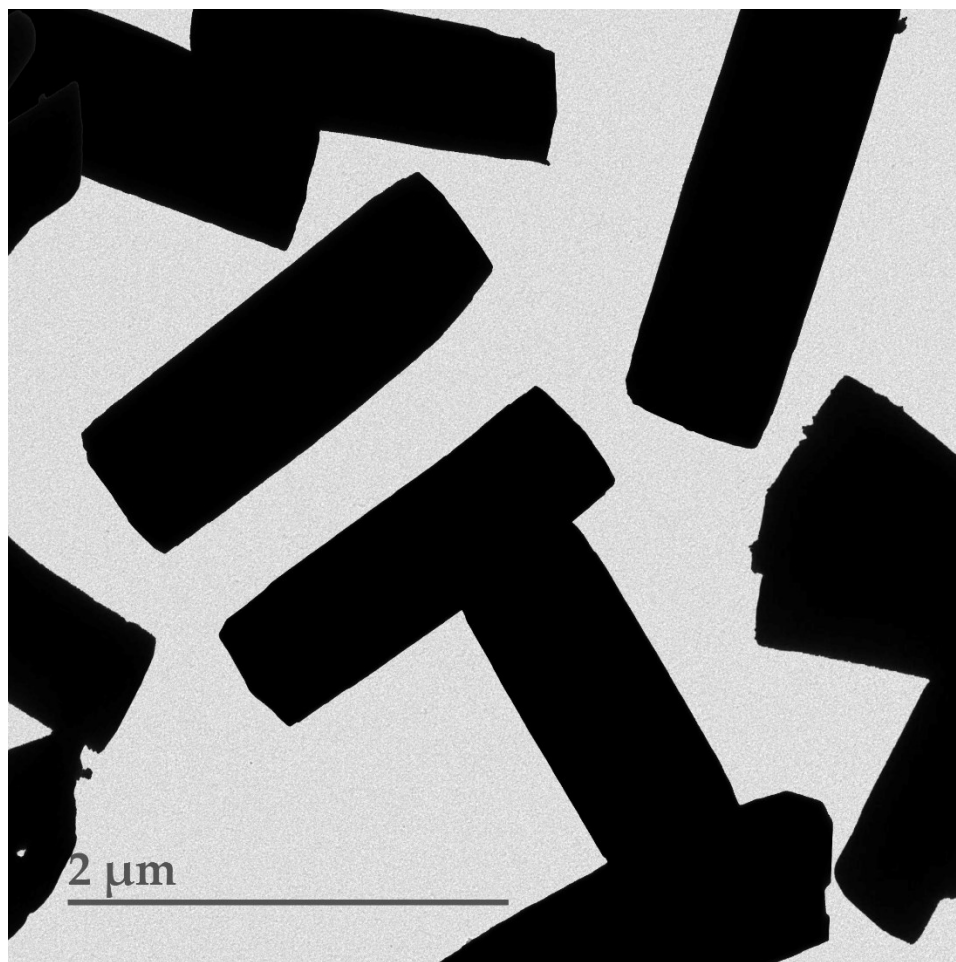

**Figure S2** The TEM images of MIL-68-In(Ru) precursors for 1h reaction.

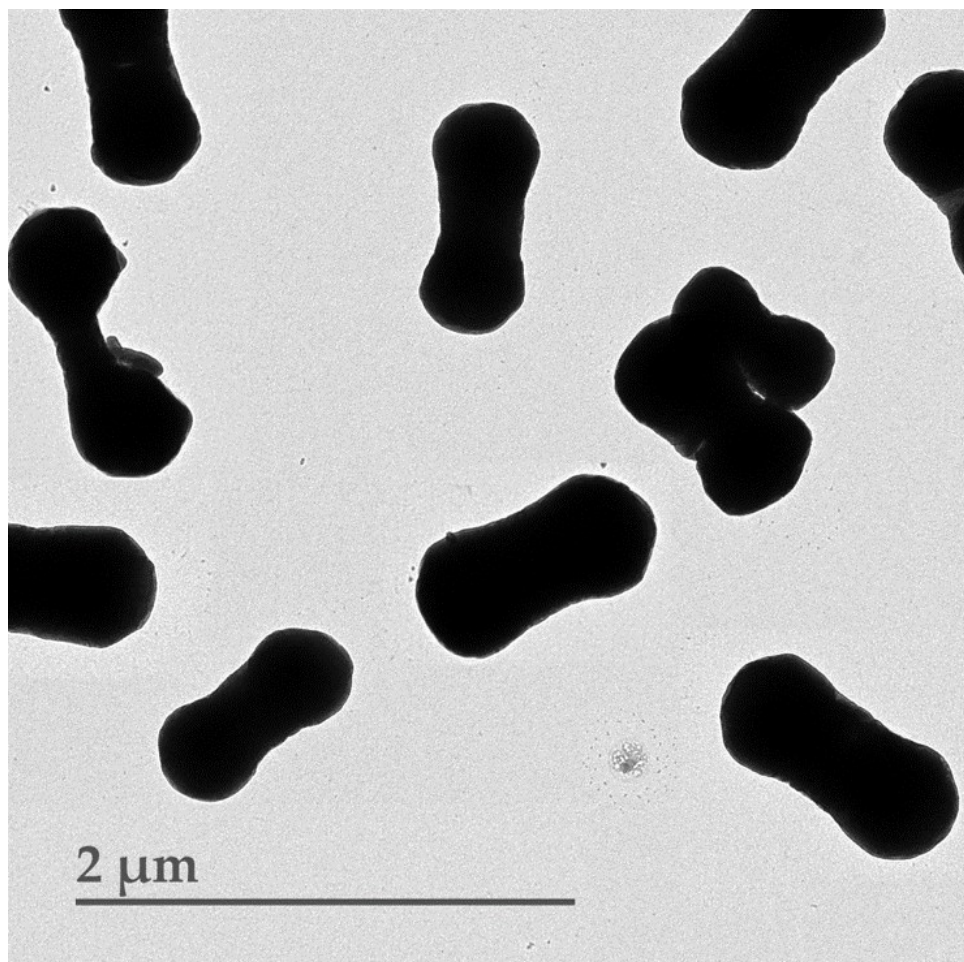

**Figure S3** The TEM images of MIL-68-In(Ru) precursors with 2% Ru doping.

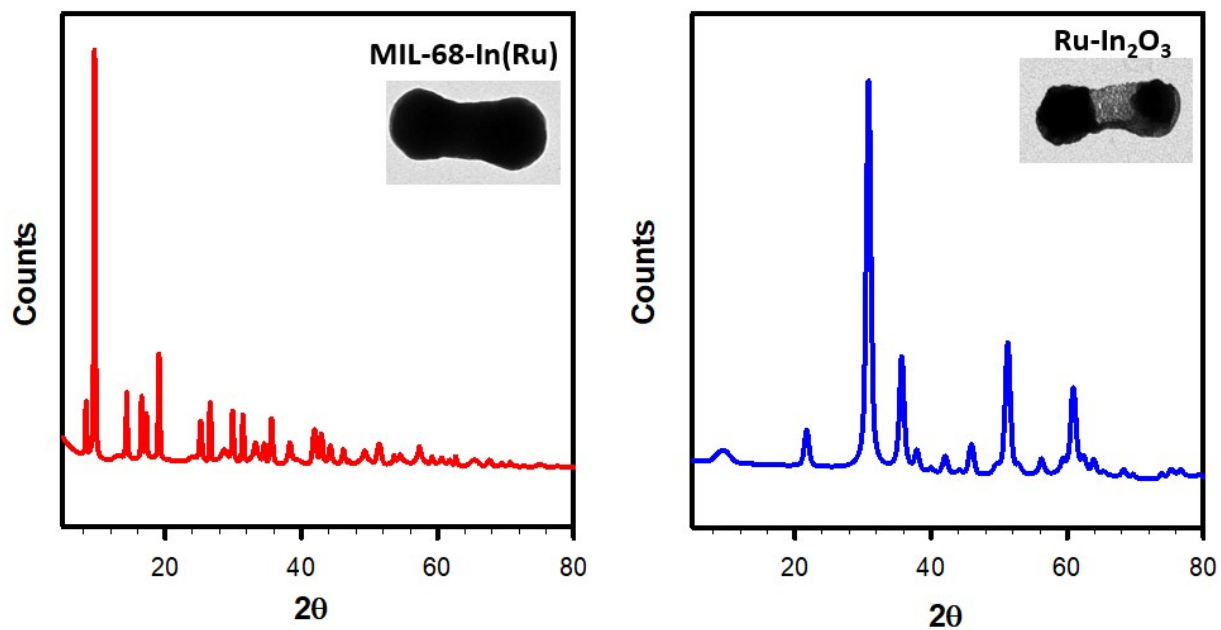

**Figure S4:** X-ray diffraction spectra of MIL-68-In(Ru) and Ru-In<sub>2</sub>O<sub>3</sub> hollow peanut samples

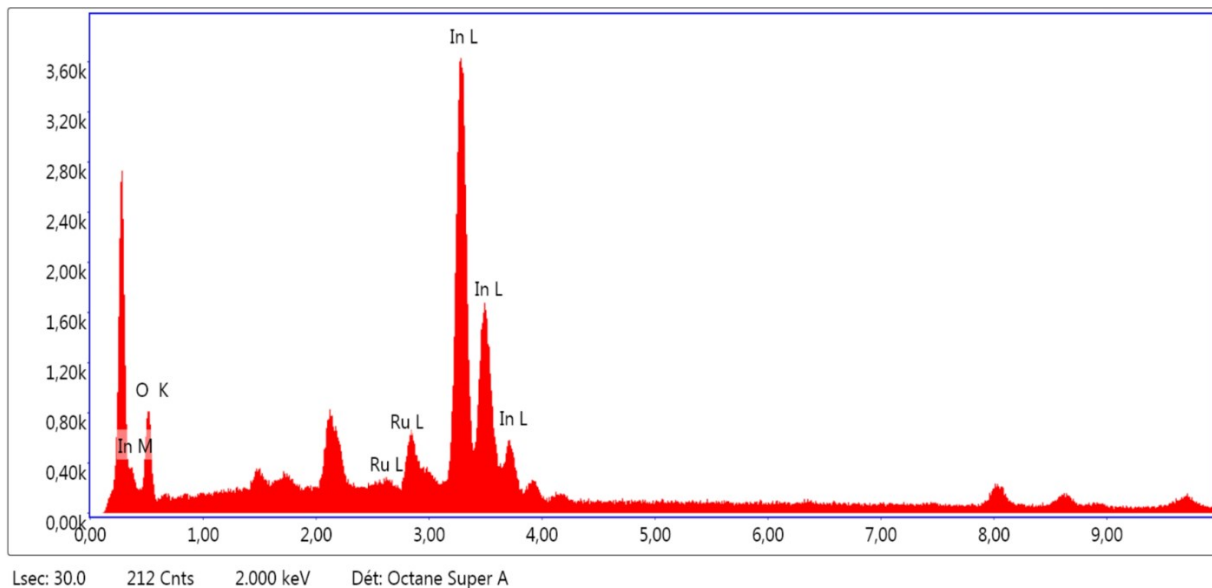

**Figure S5:** Representative EDX analysis collected on 2wt % Ru-In<sub>2</sub>O<sub>3</sub> HPNs samples

EDX spectrum confirms that Ru-In<sub>2</sub>O<sub>3</sub> HPNs mainly compose of Ru, In and O. The Cu signals are from the substrate

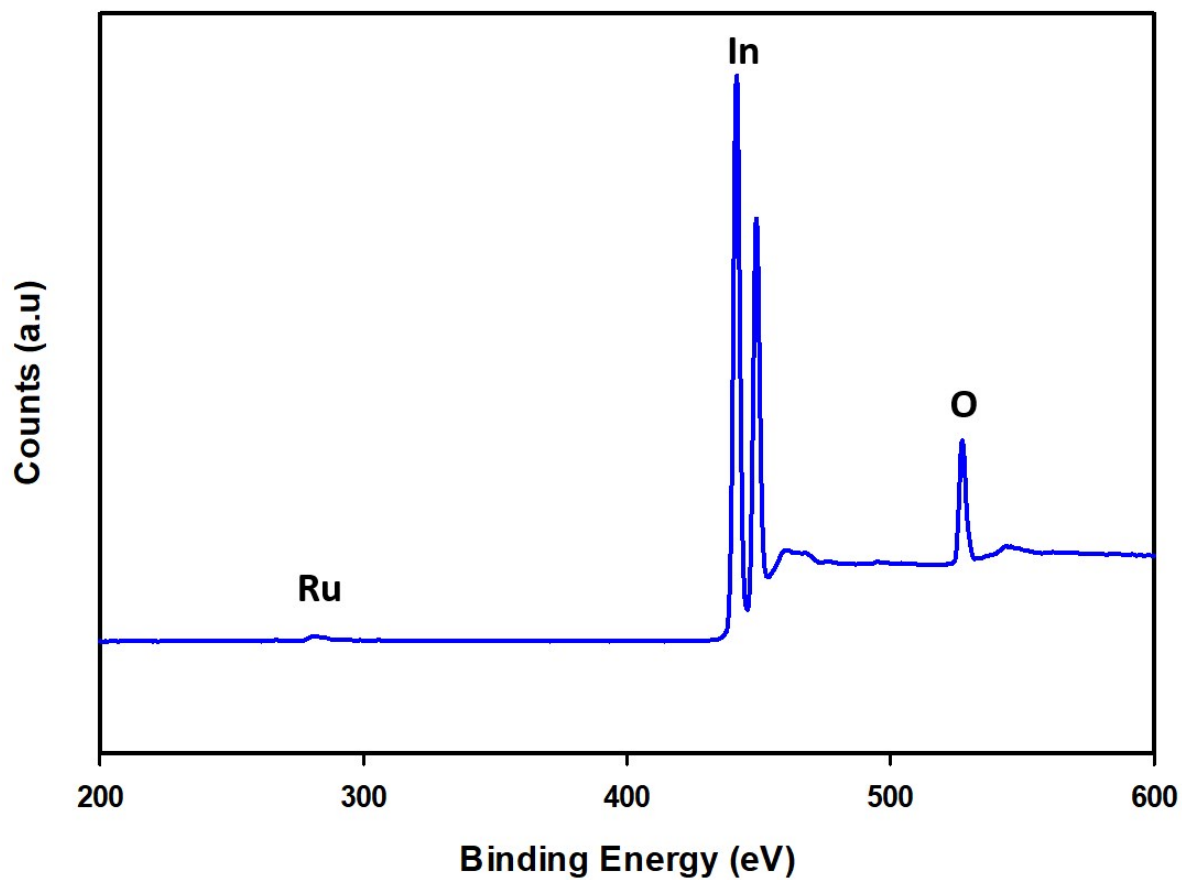

**Figure S6:** Survey XPS spectra of 2 wt% Ru-In<sub>2</sub>O<sub>3</sub>

XPS spectrum confirms that Ru-In<sub>2</sub>O<sub>3</sub> HPNs mainly compose of Ru, In and O

| Element | Composition |
|---------|-------------|
| In      | 39.81%      |
| O       | 58.45%      |
| Ru      | 0.56%       |



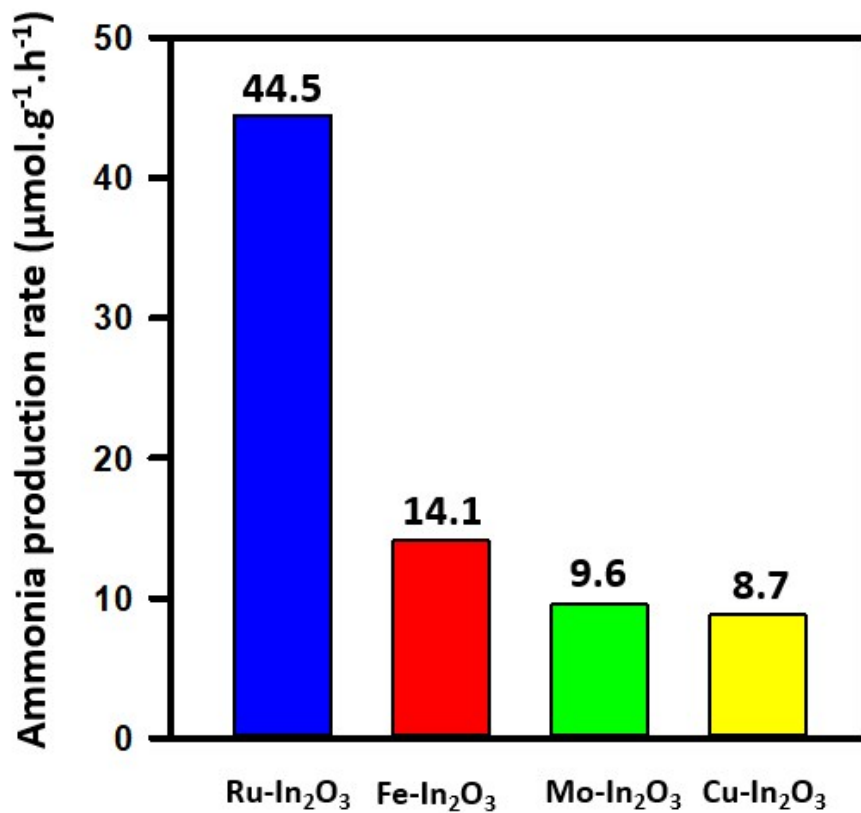

**Figure S7:** Photocatalytic NH<sub>3</sub> production rate of different transition metal dopants

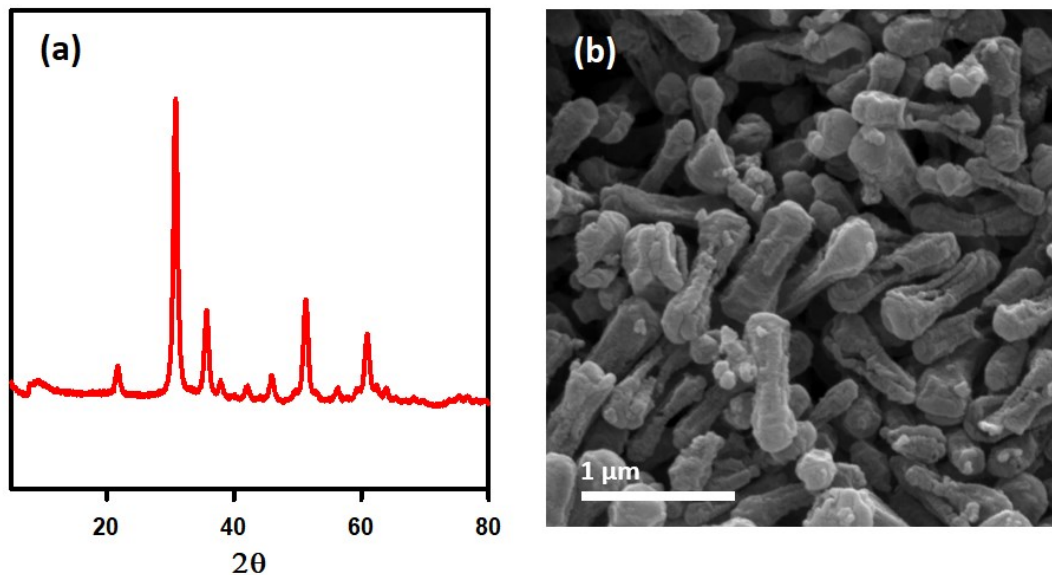

**Figure S8:** (a) X-ray diffraction spectra and (b) SEM images of 2% Ru-In<sub>2</sub>O<sub>3</sub> hollow peanuts after 6 cycles of photocatalytic test

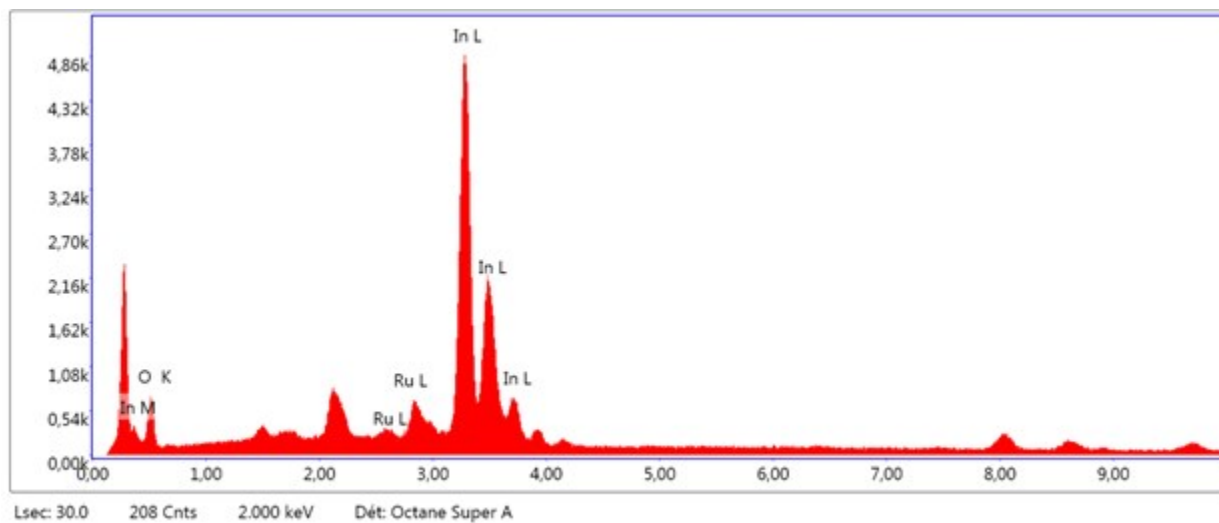

**Figure S9:** EDX analysis collected on 2wt % Ru-In<sub>2</sub>O<sub>3</sub> HPNs samples hollow peanuts after 6 cycles of photocatalytic test
